# Supplementary material for: Probing the combined additions of Ca2+ and PO43− in the stabilized ZrO2 polymorph: structural, morphological and mechanical analysis
Source: Royal Society of Chemistry journal article supplement (doi:10.1039/c8ce01381k), 2018-01-01
Supplement: c8ce01381k1.pdf [file c8ce01381k1.pdf]

## Supporting Information

### Probing the combined additions of $\text{Ca}^{2+}$ and $\text{PO}_4^{3-}$ in yttria stabilized $\text{ZrO}_2$ polymorph. Structural, morphological and mechanical analysis

S. Kalaivani, V. Anamiga and S. Kannan\*

Centre for Nanoscience and Technology,  
Pondicherry University, Puducherry-605 014, INDIA

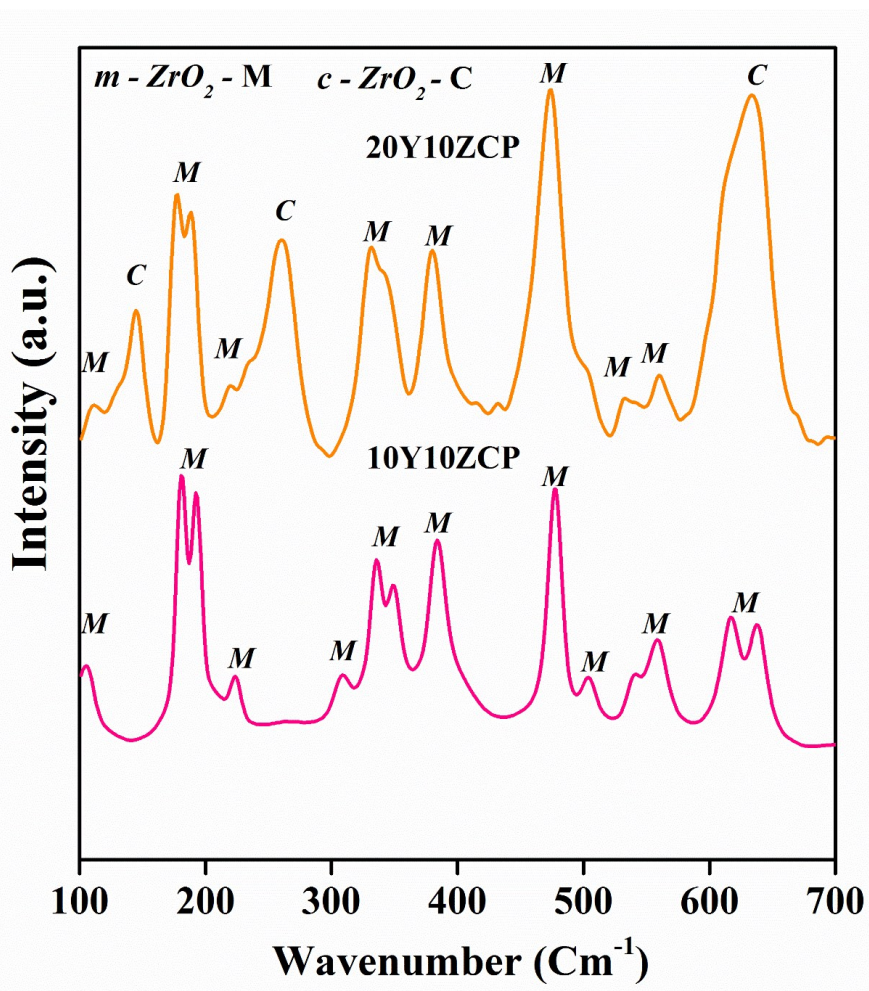

**Supporting information S1** Raman spectra for 10 and 20 mol. % yttria stabilized zirconia with successive  $\text{Ca}^{2+}$  and  $\text{PO}_4^{3-}$  after heat treatment of  $1400^\circ\text{C}$

**Supporting information S2** Phase, Atomic position of atoms and isothermal parameters obtained from refinement.

| Sample Code | Phase                                           | Atoms   | Atomic coordinates |         |          | Wyckoff Position | $U_{\text{iso}}$ ( $\text{\AA}^2$ ) |
|-------------|-------------------------------------------------|---------|--------------------|---------|----------|------------------|-------------------------------------|
| 5ZCP        | <i>c</i> -ZrO <sub>2</sub>                      | Zr      | 0.0000             | 0.0000  | 0.0000   | 4a               | 0.017(6)                            |
|             |                                                 | O       | 0.2500             | 0.2500  | 0.2500   | 8c               | 0.045(2)                            |
| 10ZCP       | <i>c</i> -ZrO <sub>2</sub>                      | Zr      | 0.0000             | 0.0000  | 0.0000   | 4a               | 0.013(4)                            |
|             |                                                 | O       | 0.2500             | 0.2500  | 0.2500   | 8c               | 0.043(2)                            |
| 15ZCP       | <i>c</i> -ZrO <sub>2</sub>                      | Zr      | 0.0000             | 0.0000  | 0.0000   | 4a               | 0.158(1)                            |
|             |                                                 | O       | 0.2500             | 0.2500  | 0.2500   | 8c               | 0.044(3)                            |
| 20ZCP       | <i>c</i> -ZrO <sub>2</sub>                      | Zr      | 0.0000             | 0.0000  | 0.0000   | 4a               | 0.015(4)                            |
|             |                                                 | O       | 0.2500             | 0.2500  | 0.2500   | 8c               | 0.040(1)                            |
| 25ZCP       | <i>c</i> -ZrO <sub>2</sub>                      | Zr      | 0.0000             | 0.0000  | 0.0000   | 4a               | 0.014(4)                            |
|             |                                                 | O       | 0.2500             | 0.2500  | 0.2500   | 8c               | 0.034(3)                            |
|             | Ca <sub>3</sub> (PO <sub>4</sub> ) <sub>2</sub> | Ca1     | -0.3064            | -0.1522 | 0.1643   | 18b              | 0.024(1)                            |
|             |                                                 | Ca2     | -0.3576            | -0.1616 | -0.0432  | 18b              | 0.009(3)                            |
|             |                                                 | Ca3     | -0.2114            | -0.0920 | 0.0543   | 18b              | 0.017(5)                            |
|             |                                                 | Ca4     | 0.0000             | 0.0000  | -0.0658  | 6a               | 0.036(4)                            |
|             |                                                 | Ca5     | 0.0000             | 0.0000  | -0.2709  | 6a               | 0.013(2)                            |
|             |                                                 | P1      | 0.0000             | 0.0000  | -0.1297  | 6a               | 0.159(1)                            |
|             |                                                 | P2      | -0.2927            | -0.0873 | -0.1189  | 18b              | 0.046(3)                            |
|             |                                                 | P3      | -0.3119            | -0.1210 | -0.2507  | 18b              | 0.030(2)                            |
|             |                                                 | O1      | -0.2085            | -0.0776 | -0.0845  | 18b              | 0.089(4)                            |
|             |                                                 | O2      | -0.2678            | -0.1605 | -0.1448  | 18b              | 0.064(4)                            |
|             |                                                 | O3      | -0.2748            | 0.0869  | -0.1559  | 18b              | 0.011(2)                            |
|             |                                                 | O4      | -0.4392            | -0.2097 | -0.1574  | 18b              | 0.030(2)                            |
|             |                                                 | O5      | -0.5353            | -0.1197 | -0.2041  | 18b              | 0.091(4)                            |
|             |                                                 | O6      | -0.4063            | -0.3461 | -0.2332  | 18b              | 0.215(6)                            |
|             |                                                 | O7      | 0.1559             | -0.0683 | -0.1920  | 18b              | 0.019(5)                            |
| O8          | -0.4076                                         | 0.0180  | -0.2449            | 18b     | 0.318(3) |                  |                                     |
| O9          | 0.0716                                          | -0.0627 | -0.0197            | 18b     | 0.036(2) |                  |                                     |
| O10         | 0.0000                                          | 0.0000  | 0.1503             | 6a      | 0.107(6) |                  |                                     |
| 30ZCP       | <i>c</i> -ZrO <sub>2</sub>                      | Zr      | 0.0000             | 0.0000  | 0.0000   | 4a               | 0.019(4)                            |
|             |                                                 | O       | 0.2500             | 0.2500  | 0.2500   | 8c               | 0.042(2)                            |
|             | Ca <sub>3</sub> (PO <sub>4</sub> ) <sub>2</sub> | Ca1     | -0.2816            | -0.1432 | 0.1629   | 18b              | 0.014(3)                            |
|             |                                                 | Ca2     | -0.3569            | -0.1406 | -0.0407  | 18b              | 0.009(2)                            |
|             |                                                 | Ca3     | -0.2659            | -0.1260 | 0.0577   | 18b              | 0.011(4)                            |
|             |                                                 | Ca4     | 0.0000             | 0.0000  | -0.0718  | 6a               | 0.089(5)                            |
|             |                                                 | Ca5     | 0.0000             | 0.0000  | -0.2600  | 6a               | 0.042(2)                            |
|             |                                                 | P1      | 0.0000             | 0.0000  | 0.0012   | 6a               | 0.012(5)                            |
|             |                                                 | P2      | -0.2978            | -0.1237 | -0.1319  | 18b              | 0.050(3)                            |
|             |                                                 | P3      | -0.3027            | -0.2001 | -0.2334  | 18b              | 0.014(2)                            |

|                                                          |     |         |         |         |     |          |
|----------------------------------------------------------|-----|---------|---------|---------|-----|----------|
|                                                          | O1  | -0.1779 | -0.0654 | -0.0989 | 18b | 0.063(3) |
|                                                          | O2  | -0.2530 | -0.2481 | -0.1428 | 18b | 0.090(8) |
|                                                          | O3  | -0.2598 | 0.0809  | -0.1603 | 18b | 0.065(2) |
|                                                          | O4  | -0.4757 | -0.2671 | -0.1508 | 18b | 0.057(4) |
|                                                          | O5  | -0.4052 | -0.0386 | -0.2404 | 18b | 0.089(1) |
|                                                          | O6  | -0.4453 | -0.1918 | -0.2160 | 18b | 0.011(6) |
|                                                          | O7  | 0.0357  | -0.1377 | -0.1878 | 18b | 0.018(4) |
|                                                          | O8  | -0.4123 | 0.2420  | -0.2699 | 18b | 0.067(2) |
|                                                          | O9  | 0.0386  | -0.0967 | -0.0303 | 18b | 0.061(1) |
|                                                          | O10 | 0.0000  | 0.0000  | 0.0652  | 6a  | 0.102(5) |
| <i>c</i> -ZrO <sub>2</sub>                               | Zr  | 0.0000  | 0.0000  | 0.0000  | 4a  | 0.014(4) |
|                                                          | O   | 0.2500  | 0.2500  | 0.2500  | 8c  | 0.035(2) |
| 40ZCP<br>Ca <sub>3</sub> (PO <sub>4</sub> ) <sub>2</sub> | Ca1 | -0.2732 | -0.1389 | 0.1678  | 18b | 0.024(7) |
|                                                          | Ca2 | -0.3817 | -0.1740 | -0.0318 | 18b | 0.002(4) |
|                                                          | Ca3 | -0.2713 | -0.1422 | 0.0627  | 18b | 0.019(2) |
|                                                          | Ca4 | 0.0000  | 0.0000  | -0.0827 | 6a  | 0.059(6) |
|                                                          | Ca5 | 0.0000  | 0.0000  | -0.2660 | 6a  | 0.014(4) |
|                                                          | P1  | 0.0000  | 0.0000  | -0.0057 | 6a  | 0.072(3) |
|                                                          | P2  | -0.3150 | -0.1430 | -0.1325 | 18b | 0.044(2) |
|                                                          | P3  | -0.3522 | -0.1595 | -0.2349 | 18b | 0.108(1) |
|                                                          | O1  | -0.2635 | -0.0847 | -0.0878 | 18b | 0.034(5) |
|                                                          | O2  | -0.2064 | -0.1939 | -0.1401 | 18b | 0.039(2) |
|                                                          | O3  | -0.4736 | 0.0025  | -0.1483 | 18b | 0.018(2) |
|                                                          | O4  | -0.4757 | -0.2308 | -0.1350 | 18b | 0.021(1) |
|                                                          | O5  | -0.4002 | -0.0422 | -0.2177 | 18b | 0.033(5) |
|                                                          | O6  | -0.4207 | -0.3007 | -0.2128 | 18b | 0.013(2) |
|                                                          | O7  | 0.0874  | -0.0929 | -0.2203 | 18b | 0.031(5) |
|                                                          | O8  | -0.3642 | -0.1697 | -0.2706 | 18b | 0.023(6) |
|                                                          | O9  | 0.0037  | -0.1447 | -0.0163 | 18b | 0.074(3) |
|                                                          | O10 | 0.0000  | 0.0000  | 0.0238  | 6a  | 0.054(1) |

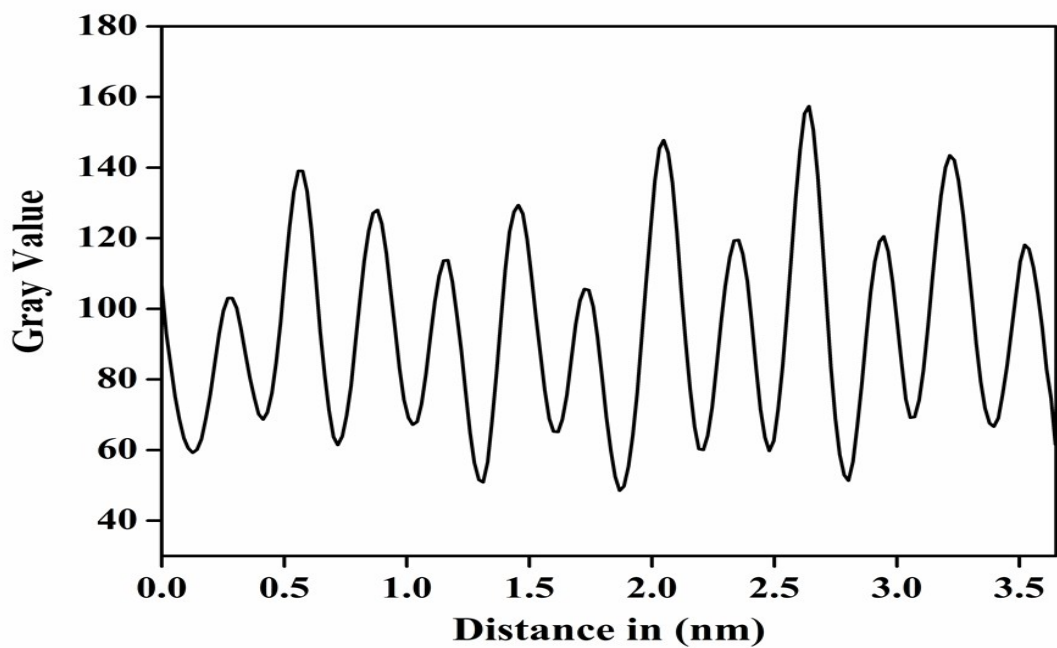

Supporting information S3 Gray value Vs Distance of TE Micrograph of 5ZCP (Fig7d).

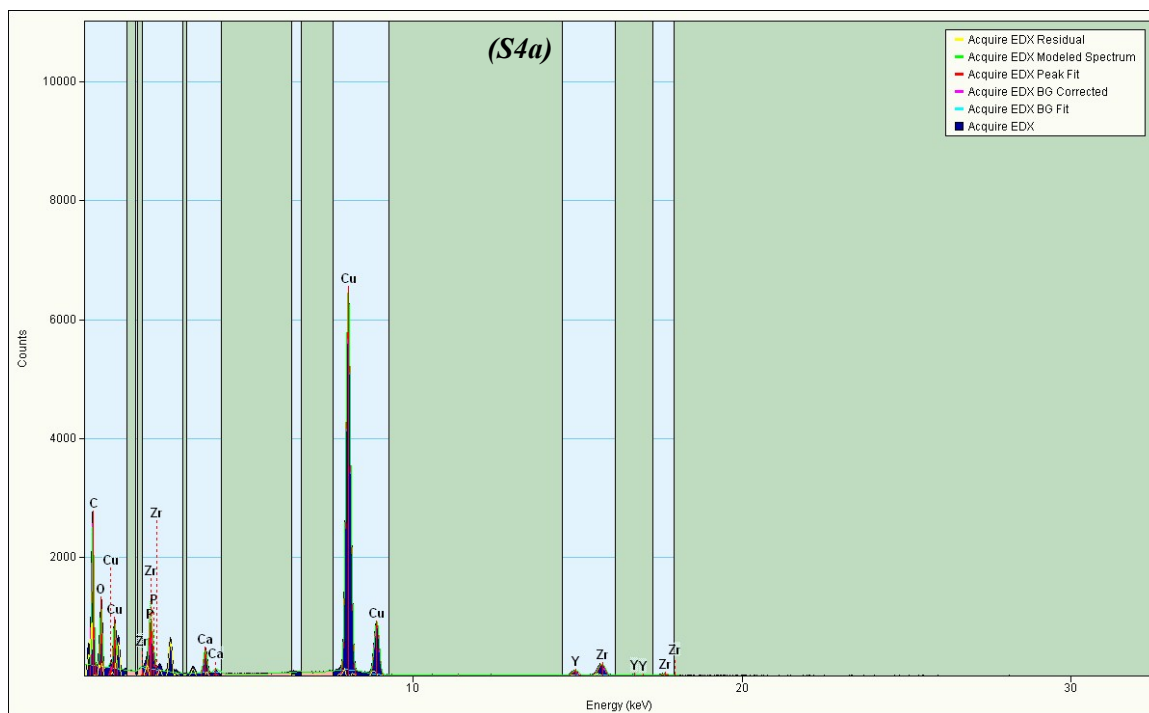

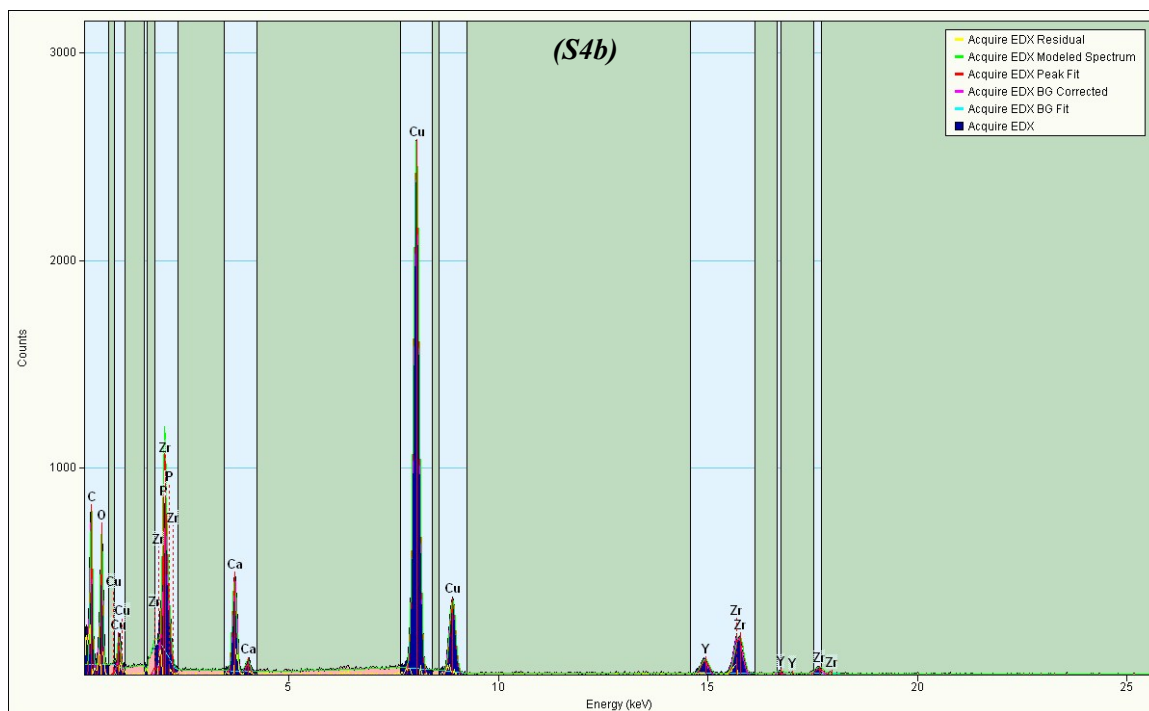

**Supporting information S4** EDX spectra recorded from TEM for 5ZCP (S4a) and 40ZCP (S4b) samples after sintering at 1400 °C
